# Supplementary material for: Comparing the Forecast Performance of Advanced Statistical and Machine Learning Techniques Using Huge Big Data: Evidence from Monte Carlo Experiments
Source: Hindawi journal article supplement (doi:10.1155/2021/6117513), 2021-01-01
Supplement: f1 [file 6117513.f1.pdf]

## Appendix

**Table 4. Variables description**

| Sr. No | Variables                                  | Symbol | Definition/Construction                                                                                                                                                              | Source of Data |
|--------|--------------------------------------------|--------|--------------------------------------------------------------------------------------------------------------------------------------------------------------------------------------|----------------|
| 1      | <b>Workers' Remittances</b>                | WR     | The transfer of foreign money by migrated workers to Pakistan.                                                                                                                       | SBP            |
| 2      | <b>Interest Rate</b>                       | INT    | Call money rate                                                                                                                                                                      | SBP            |
| 3      | <b>Gold prices</b>                         | GOLD   | Gold prices is defining the price of gold in which the gold is traded on gold market.                                                                                                | SBP            |
| 4      | <b>Development expenditure</b>             | DEX    | It is the type of expenditure which helps economic and social development on the country. For example, the expenditure on education, health etc.                                     | SBP            |
| 5      | <b>Major agriculture crops</b>             | AGC    | Major agriculture crops are wheat, rice, cotton, sugarcane, maize etc.                                                                                                               | SBP            |
| 6      | <b>Inflation</b>                           | INF    | Inflation is the increase in price of goods and services over time in general level. Inflation rate is measured by<br><br>$\text{CPI}_t - \text{CPI}_{t-1} / \text{CPI}_{t-1} * 100$ | SBP            |
| 7      | <b>Foreign direct investment</b>           | FDI    | FDI is the type of investment in which the people or organization of one country invested in company of property of other countries.                                                 | SBP            |
| 8      | <b>Trade openness</b>                      | TO     | Trade openness is defined as the ratio of trade to GDP                                                                                                                               | SBP            |
| 9      | <b>Exchange rate/Nominal exchange rate</b> | EXR    | Value of the rupees per unit of US dollar                                                                                                                                            | IFS            |
| 10     | <b>Stock market performance</b>            | SP     | Share prices                                                                                                                                                                         | IFS            |
| 11     | <b>Investment return of Pak</b>            | IRPak  | $0.8\text{INT}_{\text{PK}} + 0.2\text{dLn}(\text{SP}_{\text{PK}})$<br><br>Where $\text{INT}_{\text{PK}}$ is interest rate and $\text{SP}_{\text{PK}}$ is share prices of Pakistan.   | IFS            |
| 12     | <b>Investment return of US</b>             | IRUS   | $0.8\text{INT}_{\text{US}} + 0.2\text{dLn}(\text{SP}_{\text{US}})$<br><br>Where $\text{INT}_{\text{US}}$ is interest rate and $\text{SP}_{\text{US}}$ is share prices of US.         | IFS            |
| 13     | <b>Real Domestic Product</b>               | GDP    | It is defined as, the total value of final goods and services which are produced inside the boundary of the country in a given period.                                               | WDI            |

|    |                                         |      |                                                                                                                                                                                       |                                              |
|----|-----------------------------------------|------|---------------------------------------------------------------------------------------------------------------------------------------------------------------------------------------|----------------------------------------------|
| 14 | <b>Unemployment</b>                     | UEMP | Unemployment is defined as, the people who want to work but do not have a job.                                                                                                        | WDI                                          |
| 15 | <b>Foreign debts</b>                    | DEBT | Foreign debt is a money that one country borrowed from outside country or organization. It is also known as external debt.                                                            | WDI                                          |
| 16 | <b>Real effective exchange rate</b>     | REER | It is defined as, the nominal effective exchange rate which is divided by a price deflator.                                                                                           | WDI                                          |
| 17 | <b>Secondary school enrolment</b>       | SSEN | Secondary school enrolment is defined as the number of students which are enrolled in secondary school.                                                                               | WDI                                          |
| 18 | <b>Financial Liberalization</b>         | FINL | The data on financial liberalization is taken from Shabbir (2013). He used the following formula for the construction of financial liberalization.                                    | Shabbir (2013)                               |
| 19 | <b>Job skill index</b>                  |      | The Job skill index is constructed with the help of weighted index of the different skill categories.                                                                                 | Bureau of Emigration and Overseas Employment |
| 20 | <b>Wage rate</b>                        | WAGE | The amount of wage that is paid to the worker per unit of time.                                                                                                                       | Bhatti(2018)                                 |
| 21 | <b>Democracy</b>                        | DMOC | Democracy is the type of government in which people elect their representatives.                                                                                                      | ICRG                                         |
| 22 | <b>Internal Conflict</b>                | ICNF | Internal conflict is defined as, the political violence inside the country and its actual influence on the governance.                                                                | ICRG                                         |
| 23 | <b>External Conflict</b>                | XCNF | External conflict is defined as, the problem such as; diplomatic pressures, trade restrictions etc. to the mandatory government from the foreign action to violent external pressure. | ICRG                                         |
| 24 | <b>Law and order situation</b>          | LAOR | Law and order situation is defined as the condition when people follow the rule and regulation. There is no violence or threats, and the police control all the crime etc.            | ICRG                                         |
| 25 | <b>Corruption</b>                       | CRRP | The illegal actions by powerful people such as bureaucrats, government, police etc.                                                                                                   | ICRG                                         |
| 26 | <b>Terrorism index (no' of attacks)</b> | TIND | It is the use of violence and threats for the purpose of achieving political and ideological objectives.                                                                              | ICRG                                         |
| 27 | <b>Government stability</b>             | GS   | Whenever the representative of the govt. change without any threats of violence it is known as political stability.                                                                   | ICRG                                         |

|    |                             |     |                                                                                                                                 |      |
|----|-----------------------------|-----|---------------------------------------------------------------------------------------------------------------------------------|------|
| 28 | <b>Black Market Premium</b> | BMP | Black market premium is define as, the percentage difference between the black market exchange rate and official exchange rate. | ICRG |
|----|-----------------------------|-----|---------------------------------------------------------------------------------------------------------------------------------|------|

Table 4 describes the variables, symbols, definition of each variable and source of data.
